# Supplementary material for: Reason for the deactivation of SnOx in acetylene hydrochlorination
Source: Royal Society of Chemistry journal article supplement (doi:10.1039/d4nj05180g), 2025-01-01
Supplement: d4nj05180g1.pdf [file d4nj05180g1.pdf]

**Electronic Supplementary Material (ESI) for New Journal of Chemistry.**

*Supporting information for:*

**Reason for the deactivation of SnO<sub>x</sub> in acetylene  
hydrochlorination**

Han Jiang <sup>a</sup>, Ming Lu <sup>a</sup>, Xue Yin <sup>a</sup>, and Mingyuan Zhu <sup>a\*</sup>

<sup>a</sup> College of Chemistry & Chemical Engineering, Yantai University, Yantai, Shandong,  
264010 (P. R. China)

\*Corresponding author E-mail: [zhuminyuan@shzu.edu.cn](mailto:zhuminyuan@shzu.edu.cn) (Mingyuan Zhu)

## Content

|                |   |
|----------------|---|
| 1.Figures..... | 2 |
| FigureS1.....  | 3 |
| FigureS2.....  | 3 |
| FigureS3.....  | 3 |
| 2.Tables.....  | 4 |
| TableS1.....   | 4 |
| TableS2.....   | 4 |
| TableS3.....   | 4 |

## 1. Figures

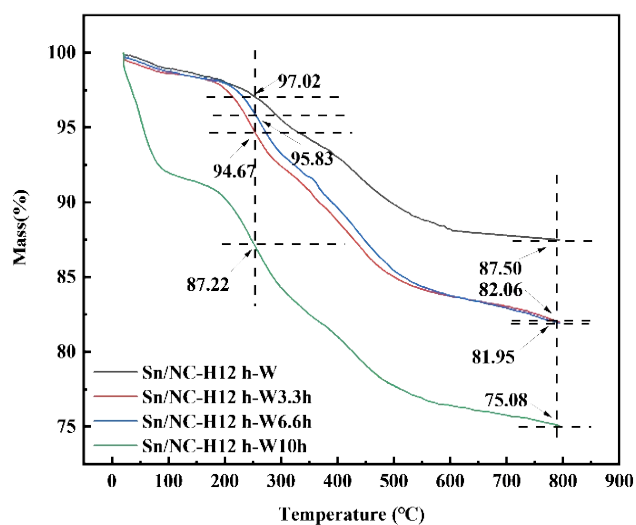

Fig. S1 N<sub>2</sub>-TG of SnO<sub>x</sub>/NC- H-W with different washing times.

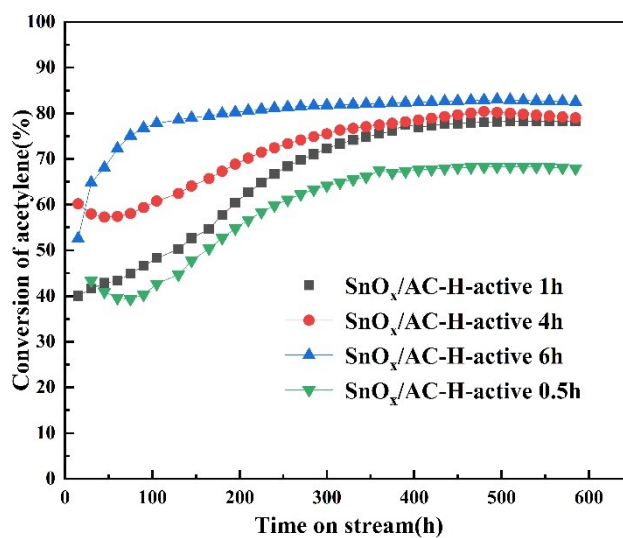

Fig. S2 Catalytic performance under different HCl activation times of SnO<sub>x</sub>/NC- H.

## 2. Tables

**Table S1 XPS element analysis with different reaction time**

| Sample                       | Sn(wt%) | C(wt%) | Cl(wt%) | O(wt%) | N(wt%) |
|------------------------------|---------|--------|---------|--------|--------|
| SnO <sub>x</sub> /AC-H-fresh | 6.55    | 67.58  | 1.56    | 22.67  | 1.65   |
| SnO <sub>x</sub> /AC-H-2     | 4.67    | 72.69  | 1.72    | 19.42  | 1.51   |
| SnO <sub>x</sub> /AC-H-4     | 4.22    | 76.15  | 2.27    | 15.62  | 1.73   |
| SnO <sub>x</sub> /AC-H-6     | 4.17    | 75.63  | 4.02    | 14.42  | 1.76   |

**Table S2 The Sn content of the SnO<sub>x</sub>/NC-H of different times**

| Sample                       | Sn(wt%) |
|------------------------------|---------|
| SnO <sub>x</sub> /AC-H-fresh | 13.92%  |
| SnO <sub>x</sub> /AC-H-2     | 10.74%  |
| SnO <sub>x</sub> /AC-H-4     | 8.54%   |
| SnO <sub>x</sub> /AC-H-6     | 5.91%   |
| SnO <sub>x</sub> /AC-H-12    | 4.01%   |

**Table S3 ICP results of catalyst**

| Sample | Sn(wt.%) |
|--------|----------|
|--------|----------|

---

|                               |      |
|-------------------------------|------|
| SnO <sub>x</sub> /AC-fresh    | 3.5% |
| SnO <sub>x</sub> /AC-used     | 2.4% |
| SnO <sub>x</sub> /AC-HCl      | 2.3% |
| SnO <sub>x</sub> -VC/AC-fresh | 4.8% |
| SnO <sub>x</sub> -VC/AC-used  | 2.9% |
| SnO <sub>x</sub> -VC /AC-HCl  | 2.8% |

---
